# Supplementary material
Source: PubMed Central journal article supplement (PMC11386816)
Supplement: PBI-18-1223-s003.pdf [file PBI-18-1223-s003.pdf]

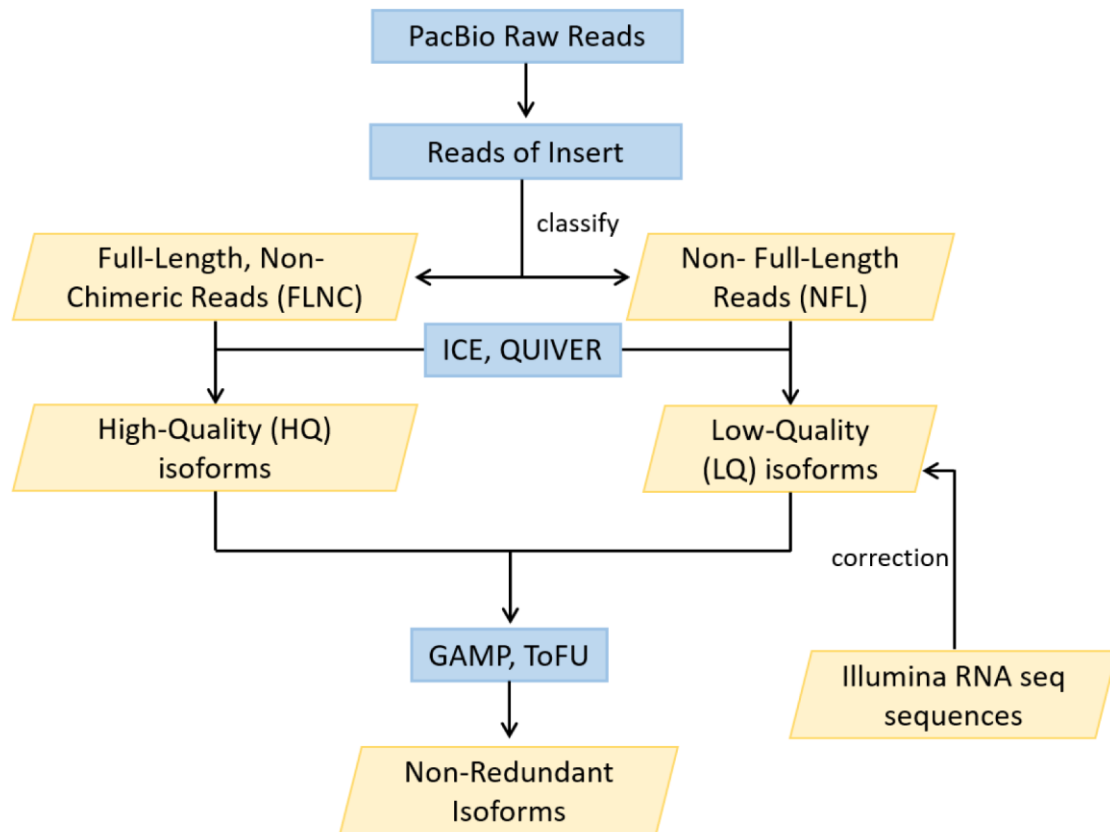

**Fig. S1** Workflow for Pacific Biosciences (PacBio) Iso-Seq data processing.

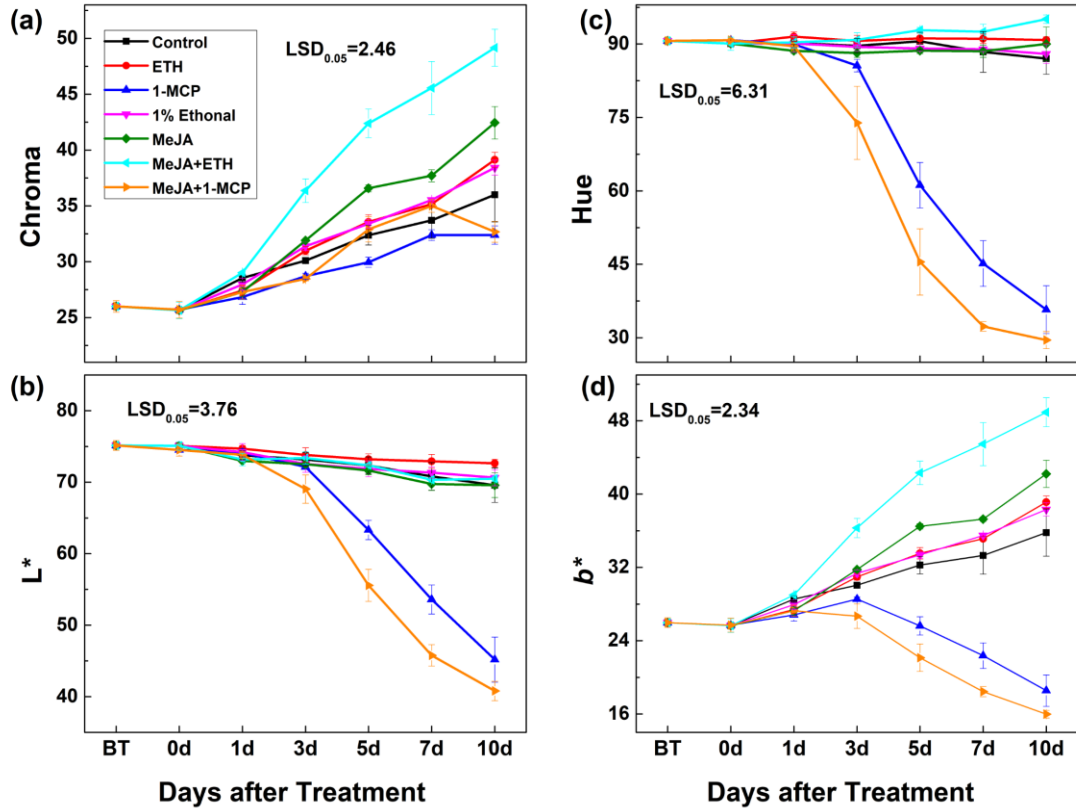

**Fig. S2** Effects of various treatments on the (A) chroma, (B) lightness ( $L^*$ ), (C) hue angle ( $Hue$ ), and (D)  $b^*$  value of 'Hongzaosu' fruits following white light irradiation. Data are presented as the mean  $\pm$  standard error of three biological replicates.

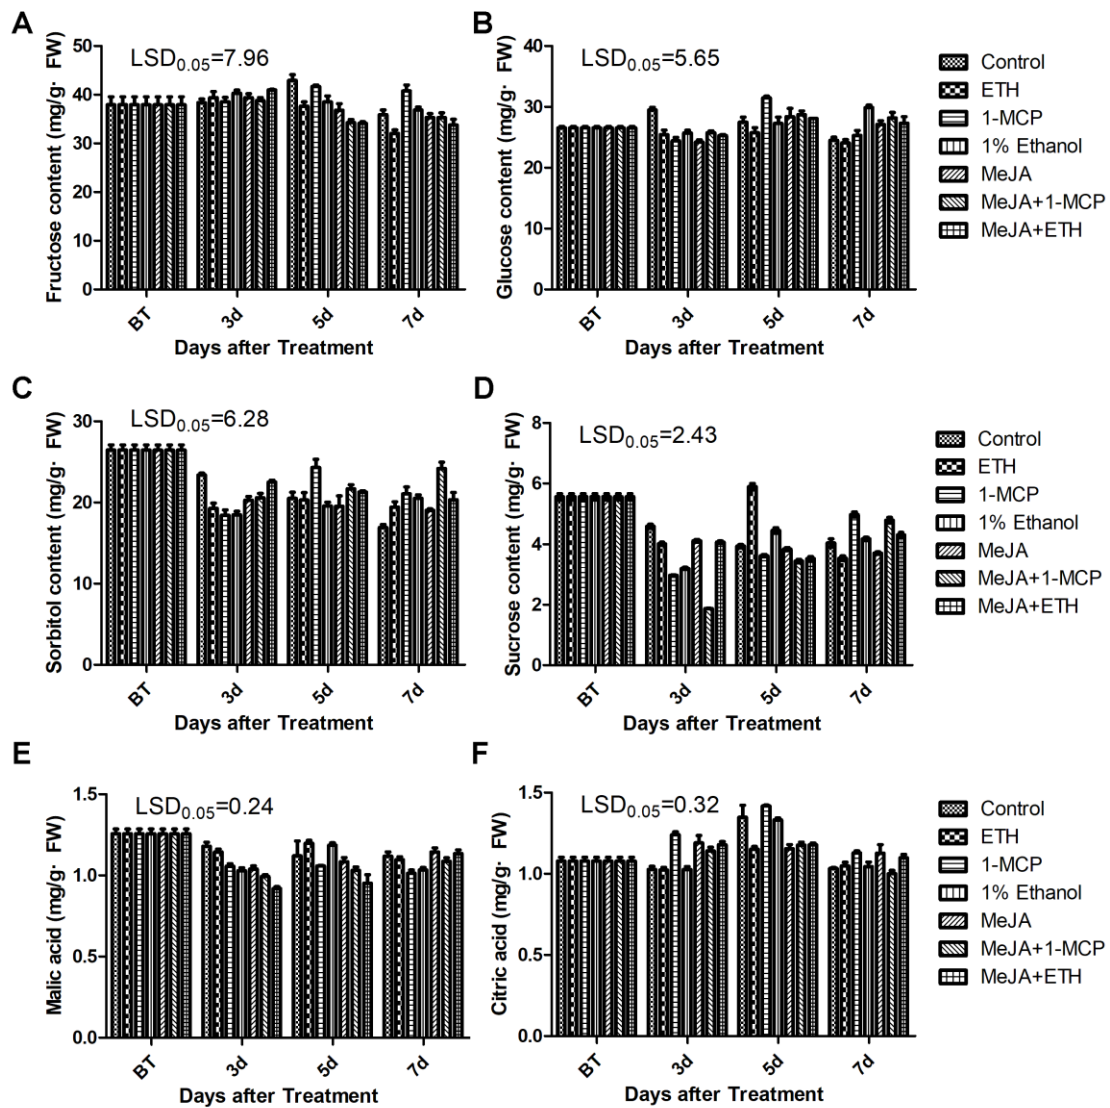

**Fig. S3** Effects of various treatments on the (A) fructose, (B) glucose, (C) sorbitol, (D) sucrose, (E) malic acid, and (F) citric acid contents of ‘Hongzaosu’ fruits following a white light irradiation. Data are presented as the mean  $\pm$  standard error of three biological replicates.

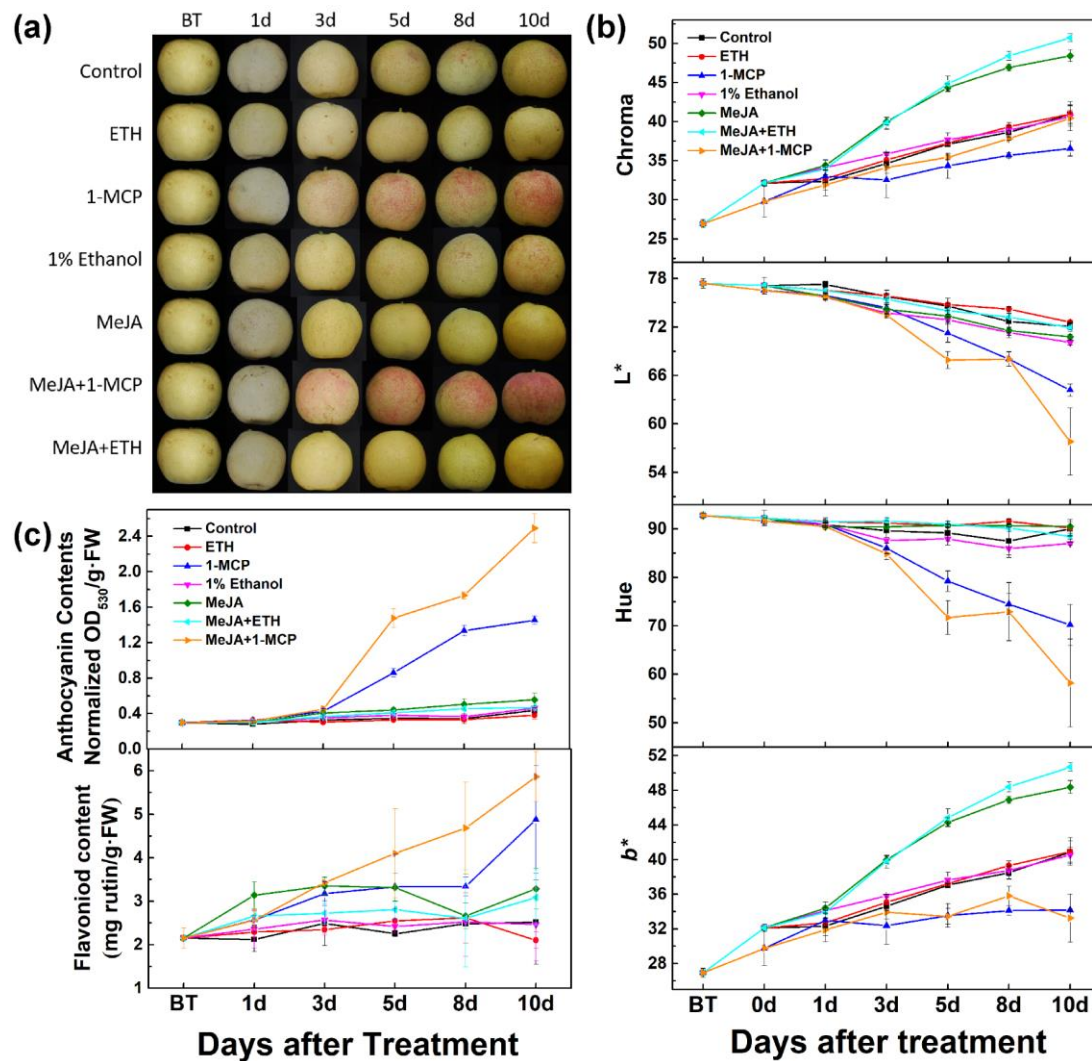

**Fig. S4** Effects of various treatments on the coloration of 'Mantianhong' Chinese sand pear fruits. (A) Representative images of 'Mantianhong' pear fruits following diverse treatments. (B) Effects of various treatments on the chroma, lightness ( $L^*$ ), hue angle ( $Hue$ ), and  $b^*$  value of 'Mantianhong' fruits. (C) Effects of diverse treatments on the total anthocyanin content and total flavonoid content. ETH, fruit treated with ethephon; MeJA, fruit treated with methyl jasmonate; 1-MCP, fruit treated with 1-methylcyclopropene. Data are presented as the mean  $\pm$  standard error of three biological replicates.

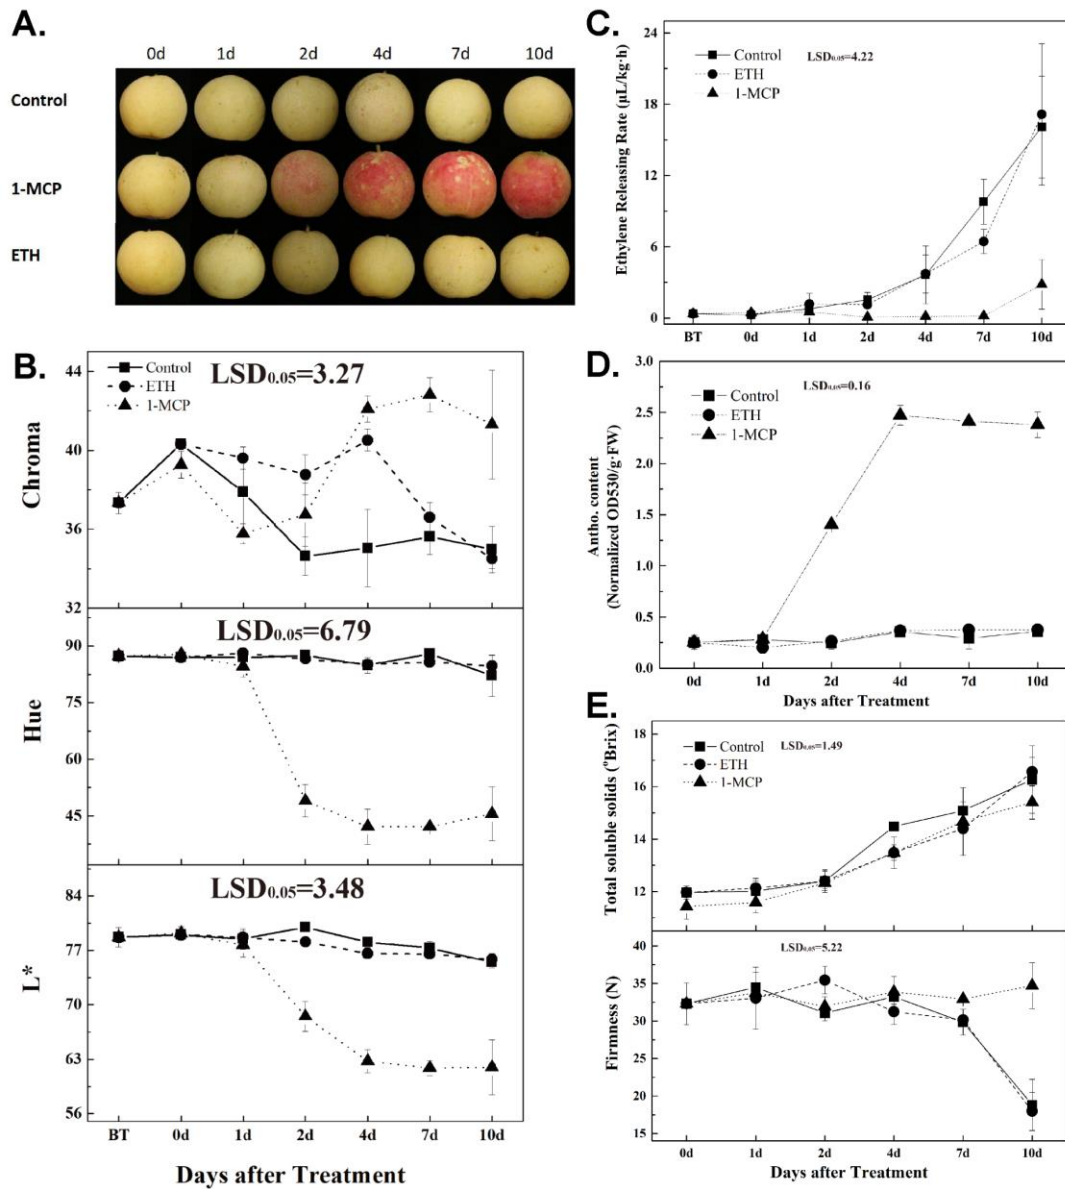

**Fig. S5** Effects of ethephon and 1-MCP treatments on the coloration of 'Nanhong' pear fruits. (A) Representative images of 'Nanhong' pear fruits following diverse treatments. (B) Effects of various treatments on the chroma, lightness ( $L^*$ ), hue angle ( $Hue$ ), and  $b^*$  value of 'Nanhong' pear fruits. (C) Effects of diverse treatments on the ethylene-release rate. (D) Effects of diverse treatments on the total anthocyanin content. (E) Effects of diverse treatments on the TSS content and firmness of 'Nanhong' pear fruits. Data are presented as the mean  $\pm$  standard error of three biological replicates.

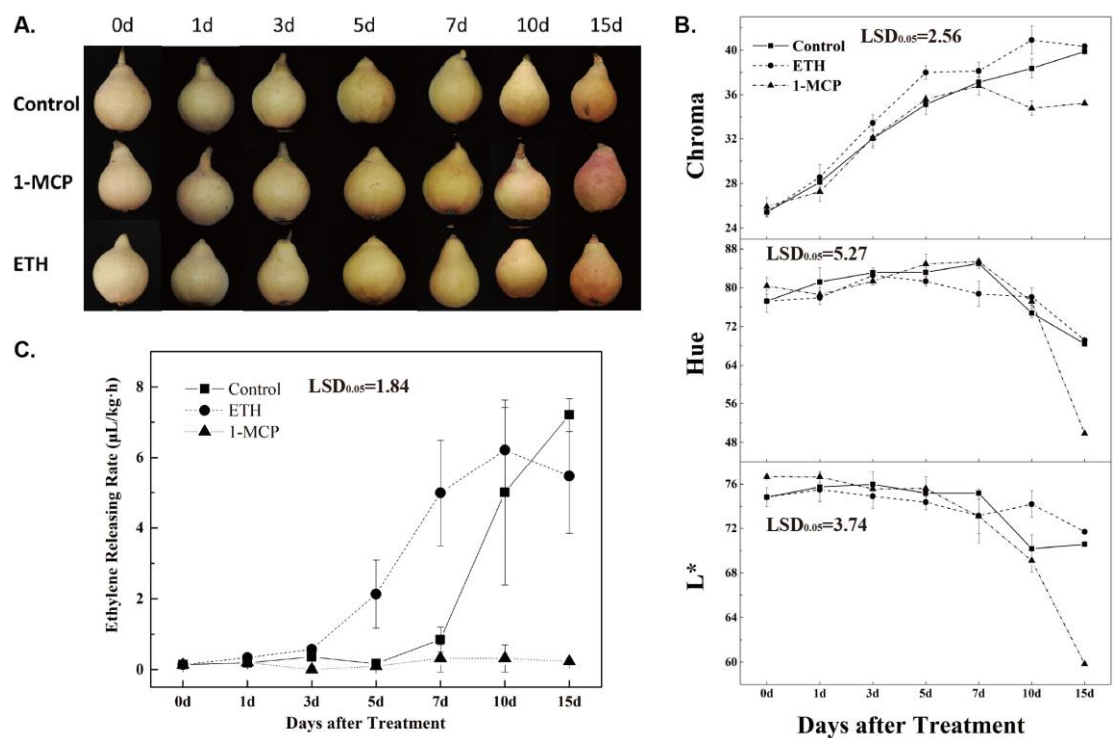

**Fig. S6** Effects of ethephon and 1-MCP treatments on the coloration of ‘Red Clapp’s Favorite’ pear fruits. (A) Representative images of ‘Red Clapp’s Favorite’ pear fruits following diverse treatments. (B) Effects of various treatments on the chroma, lightness ( $L^*$ ), hue angle ( $Hue$ ), and  $b^*$  value of ‘Red Clapp’s Favorite’ pear fruits. (C) Effects of diverse treatments on the ethylene-release rate. Data are presented as the mean  $\pm$  standard error of three biological replicates.



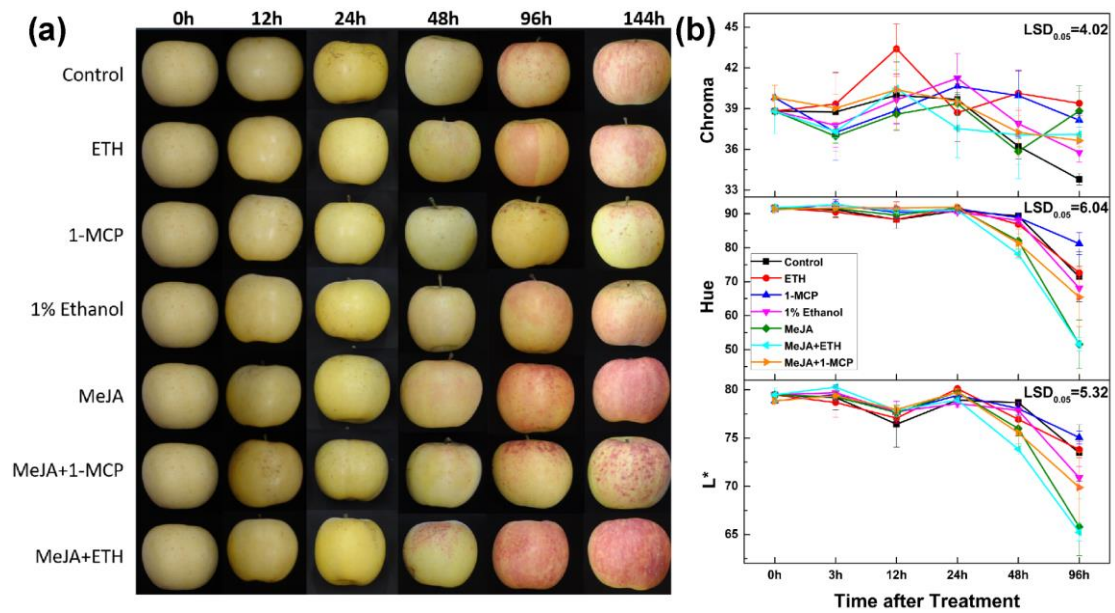

**Fig. S7** Effects of various treatments on the coloration of 'Fuji' apple fruits. (A) Photos of 'Fuji' apple fruits following diverse treatments. (B) Effects of various treatments on the chroma, lightness ( $L^*$ ), and hue angle ( $Hue$ ) of 'Fuji' apple fruits. Data are presented as the mean  $\pm$  standard error of three biological replicates.

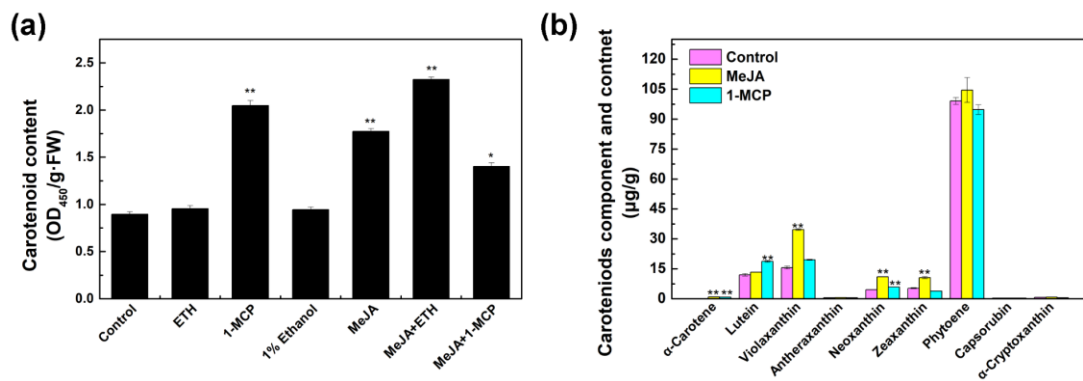

**Fig. S8** (A) Effects of different treatments on the total carotenoid contents of 'Hongzaosu' pear fruit peels. (B) Carotenoid compounds in the samples exposed to the control, 1-MCP, and MeJA treatments were analyzed and quantified by LC-MS/MS. Data are presented as the mean  $\pm$  standard error of three biological replicates.

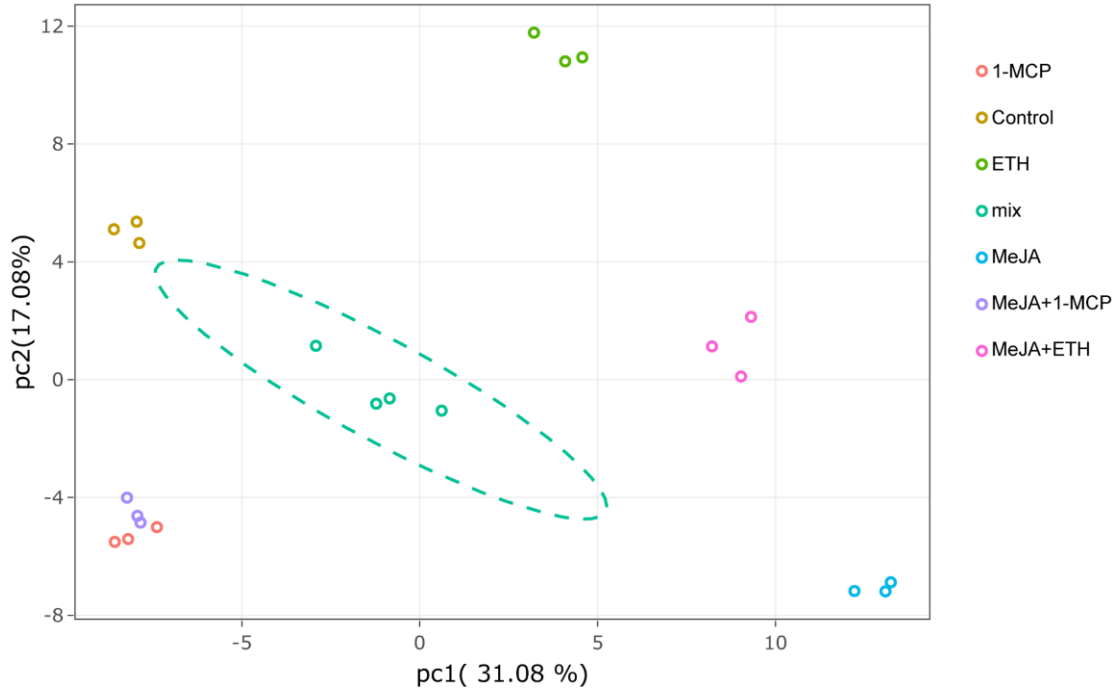

**Fig. S9** Principle component analysis plots of the first and second components of diverse treatments of ‘Hongzaosu’ pear fruit peels.

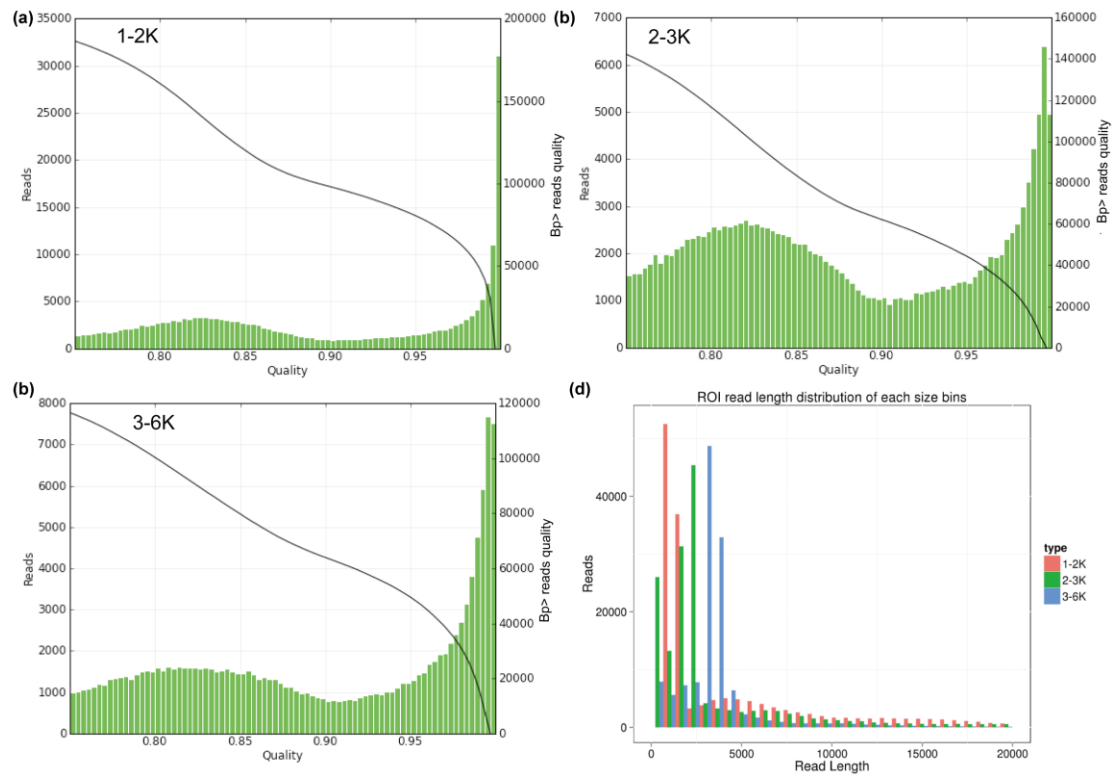

**Fig. S10** Quantification of three size-fractionated libraries (A–C) and the size range of each library (D).



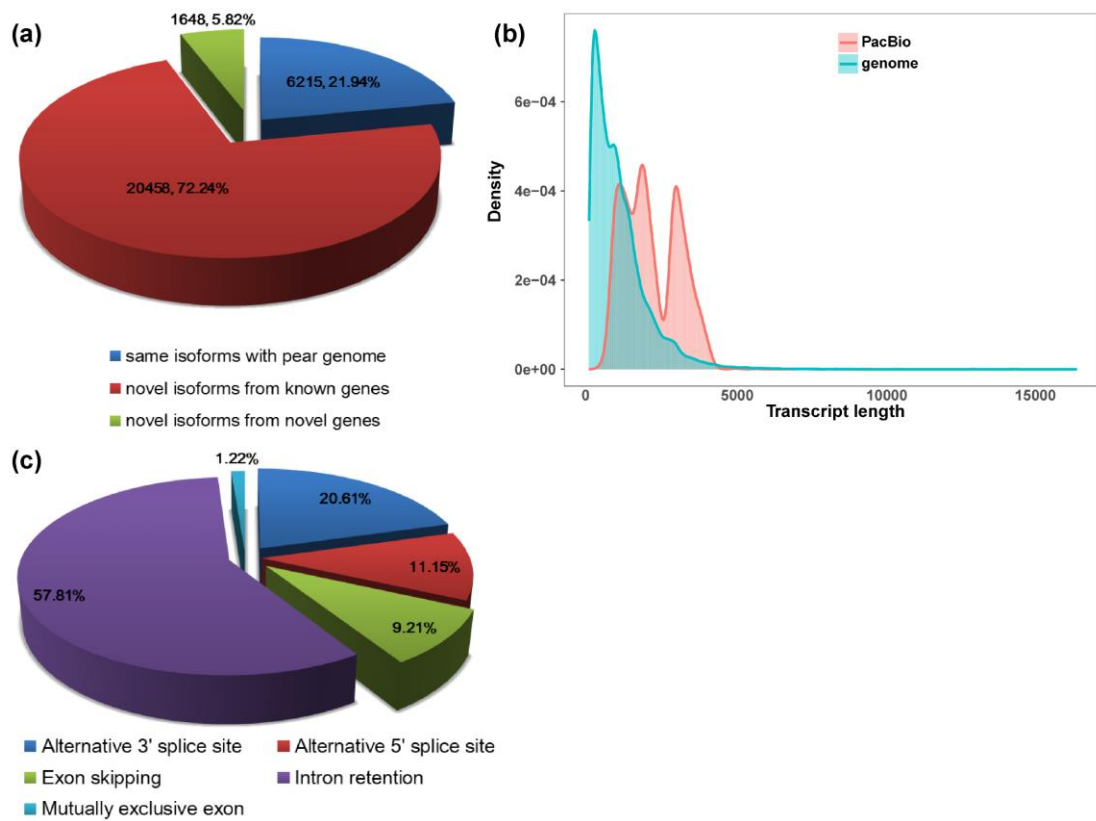

**Fig. S11** (A) Comparison of Pacific Biosciences (PacBio) and pear genome isoforms. (B) Comparison of isoform length density between the PacBio and pear genome. (C) Various types of alternative splicing events in the ‘Hongzaosu’ pear fruit peels.

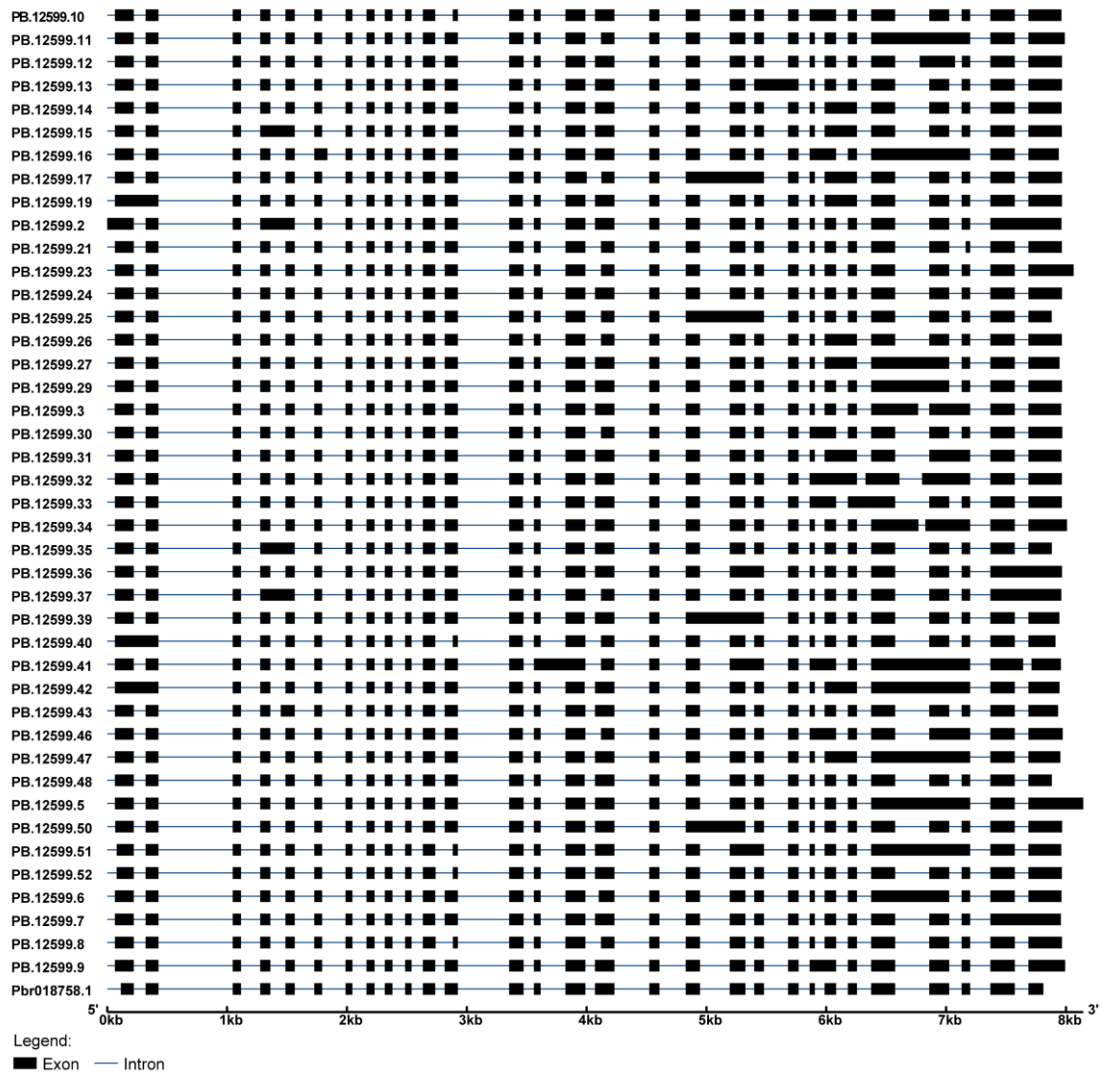

**Fig. S12** Validation of the split gene model for Pacific Biosciences (PacBio) Iso-Seq.

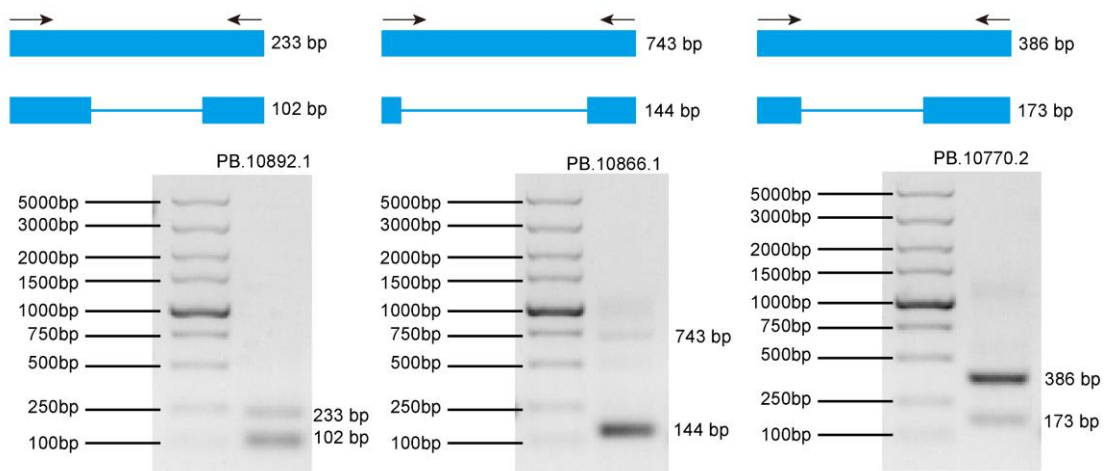

**Fig. S13** Verification of alternative splicing events in three genes by PCR.

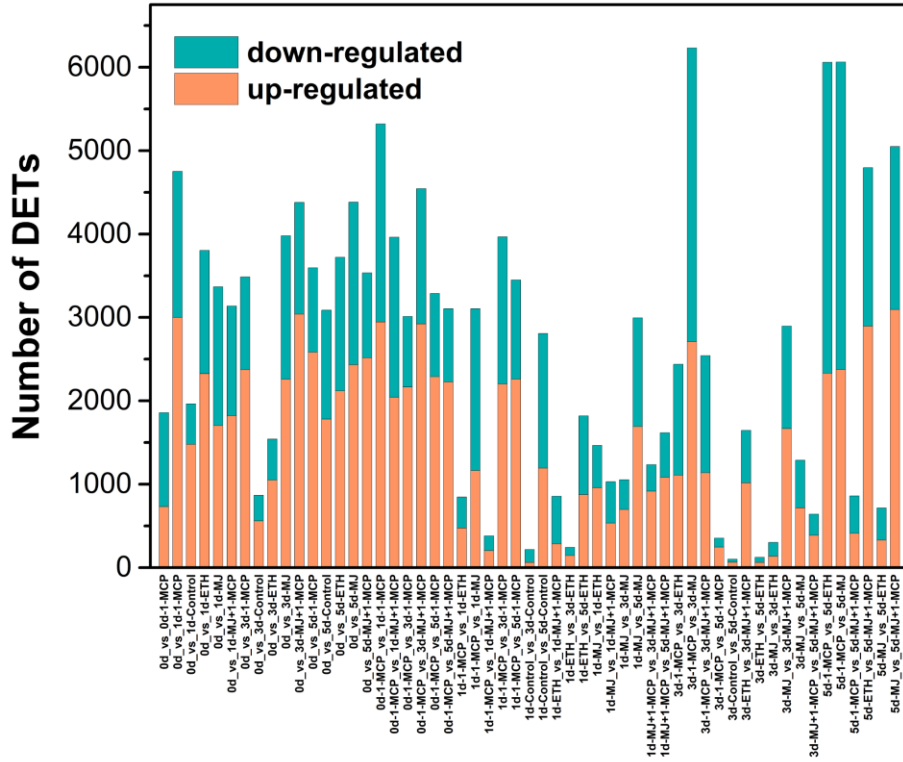

**Fig. S14** Comparison of the differentially expressed transcripts in each sample pair.

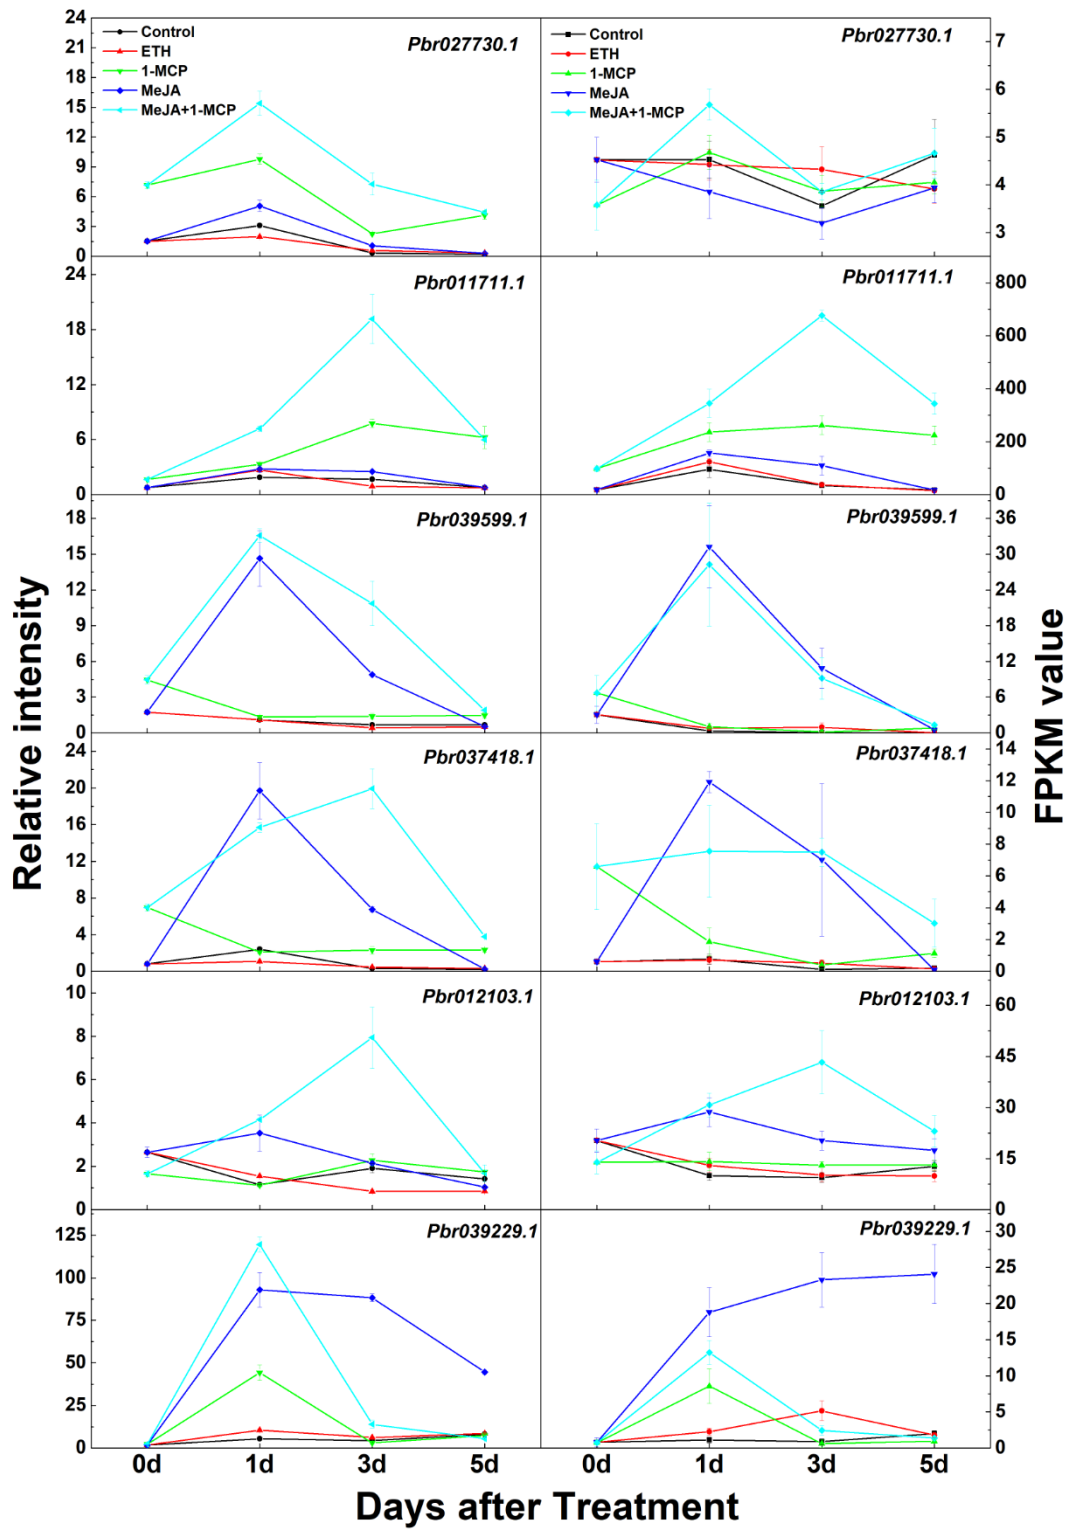

**Fig. S15** Validation of differentially expressed transcripts by qRT-PCR. Data are presented as the mean  $\pm$  standard error of three biological replicates.

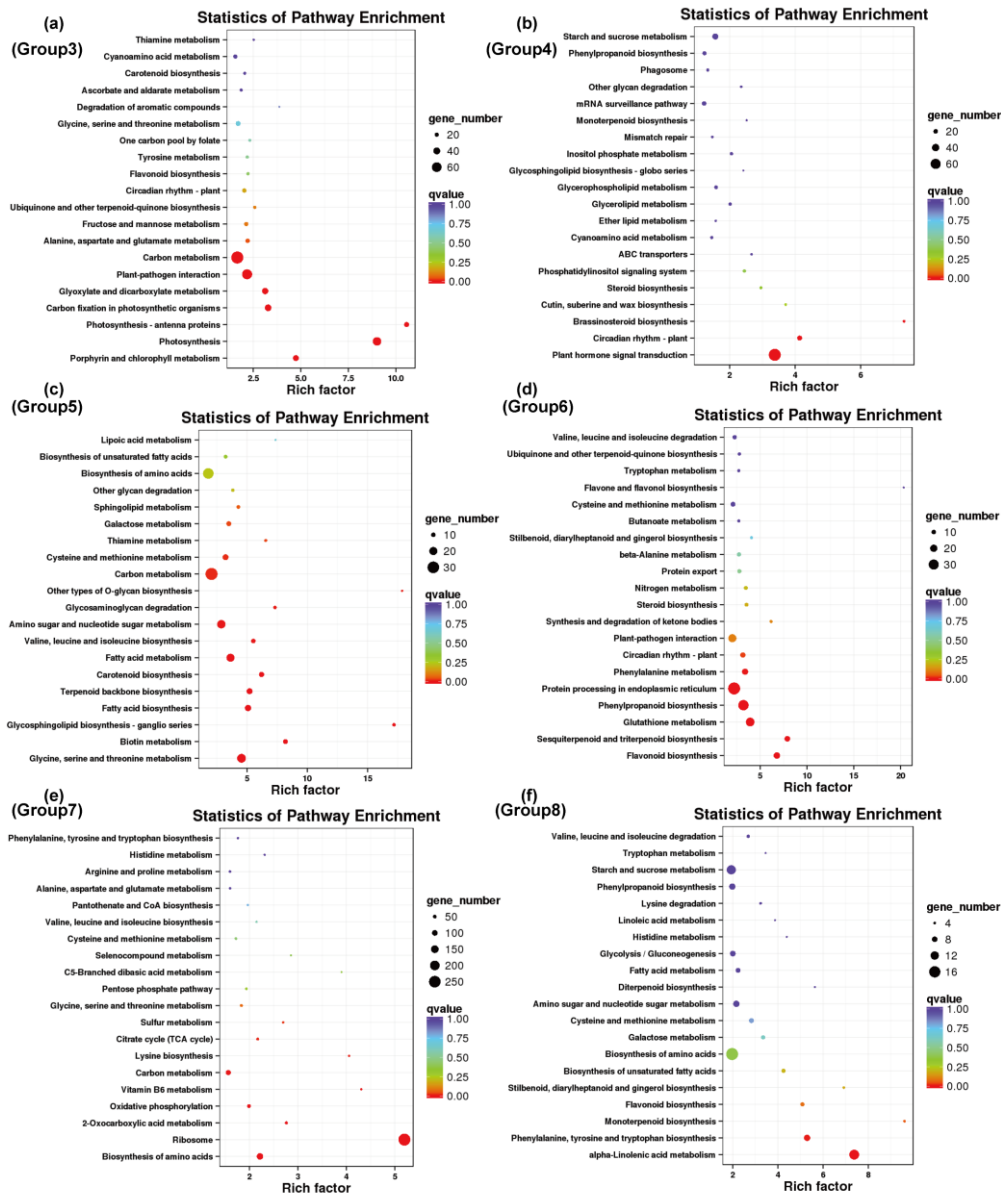

**Fig. S16** Distribution of enriched KEGG pathways for various gene expression patterns in response to hormones. (A) Group 3, transcripts that negatively responded to ethylene, including clusters 5, 6, 11, and 20. (B) Group 4, transcripts that rapidly negatively responded to ethylene, including clusters 7, 15, and 18. (C) Group 5, transcripts that positively responded to ethylene, including cluster 17. (D) Group 6, transcripts that positively responded to jasmonate and negatively responded to ethylene, including clusters 10 and 19. (E) Group 7, transcripts that positively responded to ethylene (dominant) and jasmonate, including clusters 8, 13, and 16. (F) Group 8, transcripts that positively responded to ethylene and jasmonate (dominant), including cluster 12. Each circle represents a KEGG pathway.

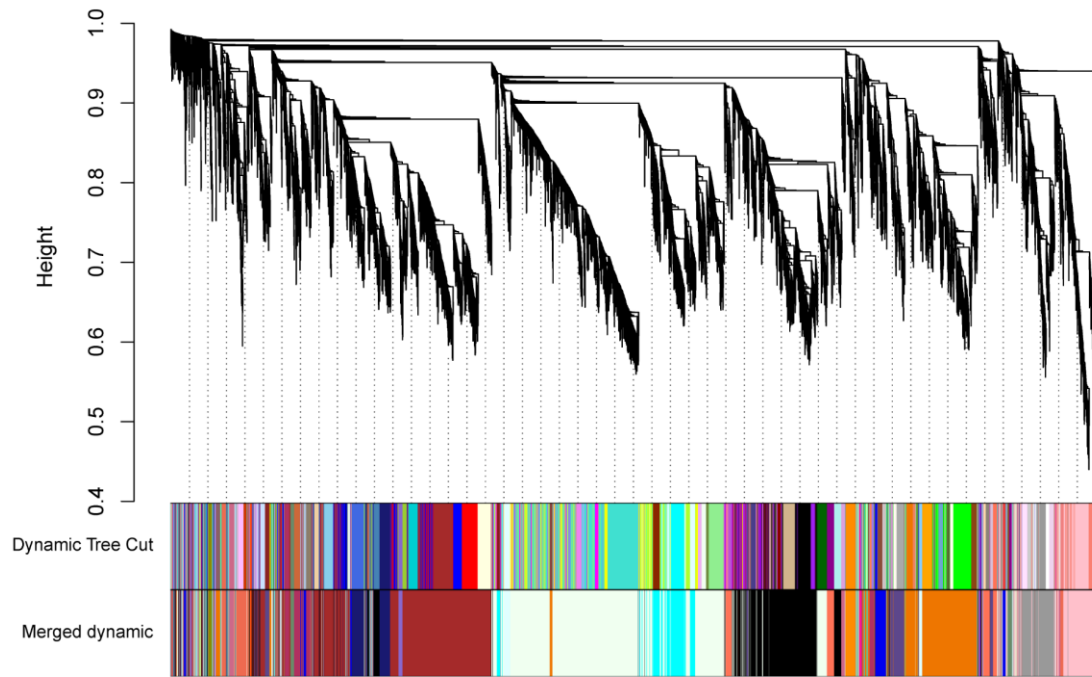

**Fig. S17** Hierarchical cluster tree with 28 modules of co-expressed genes. The lower panel presents the modules in designated colors.
